# Supplementary material for: Caveolin-1 is required for TGF-β-induced transactivation of the EGF receptor pathway in hepatocytes through the activation of the metalloprotease TACE/ADAM17
Source: PubMed Central journal article supplement — Cell Death Dis. 2014 Jul 17;5(7):e1326–. doi: 10.1038/cddis.2014.294 (PMC4123087; doi:10.1038/cddis.2014.294), 2014-07-17
Supplement: cddis2014294x1.pdf [file cddis2014294x1.pdf]

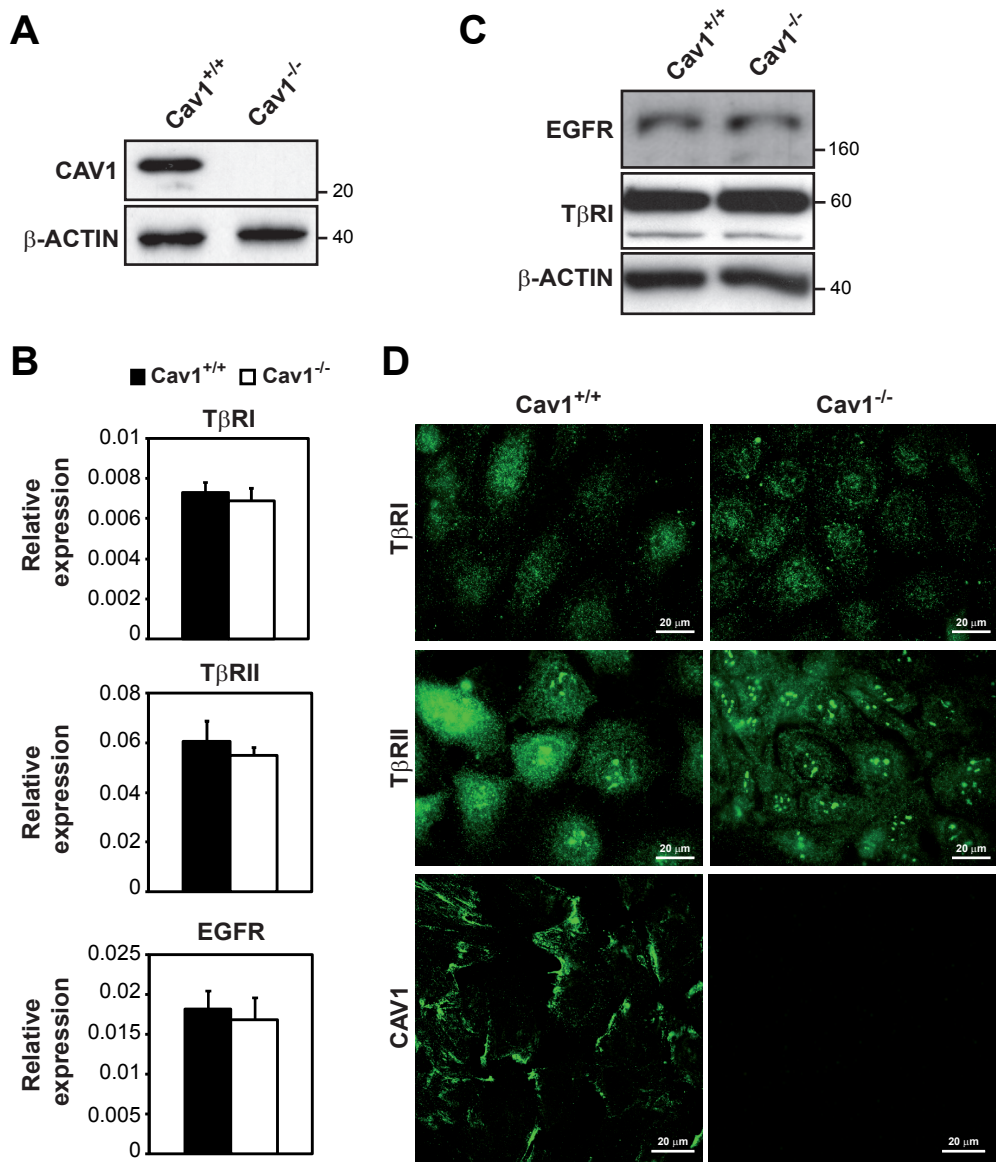

**Supplementary Figure 1. Experimental cell model.** A and C: Western blot of total protein extracts from Cav1<sup>+/+</sup> and Cav1<sup>-/-</sup> hepatocytes. B: TβRI, TβRII and EGFR relative expression measured by Real Time-PCR (N=3). D: TβRI, TβRII and Cav1 detected by immunocytochemistry; the images of TβRI and TβRII were taken using a 60X amplification in an Olympus BX-60 microscope; the images of Cav1 were taken using a 63X amplification in a Leica TCS-NT confocal microscope. Results expressed as mean ± SEM.
