# Supplementary material for: Caveolin-1 is required for TGF-β-induced transactivation of the EGF receptor pathway in hepatocytes through the activation of the metalloprotease TACE/ADAM17
Source: PubMed Central journal article supplement — Cell Death Dis. 2014 Jul 17;5(7):e1326–. doi: 10.1038/cddis.2014.294 (PMC4123087; doi:10.1038/cddis.2014.294), 2014-07-17
Supplement: cddis2014294x2.pdf [file cddis2014294x2.pdf]

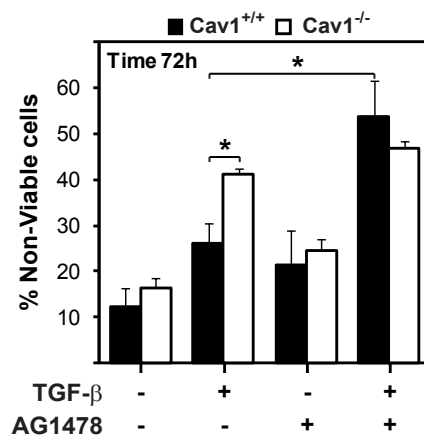

**Supplementary Figure 2. Inhibition of the EGFR with AG1478 in Cav1<sup>+/+</sup> hepatocytes recapitulates Cav1<sup>-/-</sup> phenotype in terms of cell death.** Cav1<sup>+/+</sup> and Cav1<sup>-/-</sup> cell lines were treated with TGF- $\beta$  (2 ng/ml) at the times shown, after previous FBS starvation (16 h). Cells were treated with the EGFR tyrosine kinase inhibitor AG1478 (20 mM) 30 min prior to the TGF- $\beta$  treatment. Cell viability was measured using Trypan blue staining; expressed as percentage of non-viable cells (N=2). Results expressed as mean  $\pm$  SEM. Statistical comparison using one-way ANOVA with Tukey's multiple comparison test for comparisons within each cell line or two-way ANOVA with Bonferroni post-hoc test to compare Cav1<sup>+/+</sup> and Cav1<sup>-/-</sup> hepatocytes: \* p<0.05.
