# Supplementary material for: Caveolin-1 is required for TGF-β-induced transactivation of the EGF receptor pathway in hepatocytes through the activation of the metalloprotease TACE/ADAM17
Source: PubMed Central journal article supplement — Cell Death Dis. 2014 Jul 17;5(7):e1326–. doi: 10.1038/cddis.2014.294 (PMC4123087; doi:10.1038/cddis.2014.294), 2014-07-17
Supplement: cddis2014294x3.pdf [file cddis2014294x3.pdf]

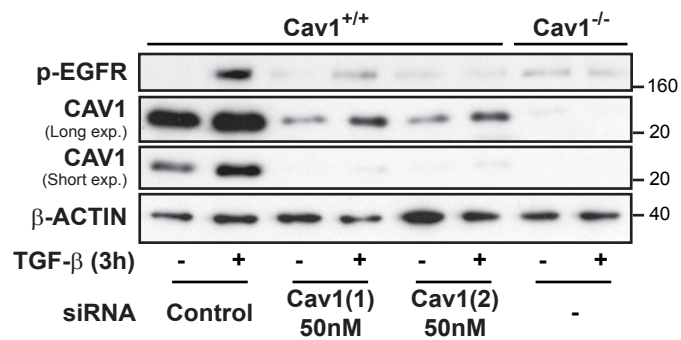

**Supplementary Figure 3. Effect of targeting knock-down Cav1 with specific siRNAs on TGF-β-mediated EGF receptor transactivation in hepatocytes.** Cav1<sup>+/+</sup> and Cav1<sup>-/-</sup> hepatocytes were treated with TGF-β (2 ng/ml) at the times shown, after previous FBS starvation (16 h). Cells (50% confluence) were transiently transfected with 50 nM siRNA during 8 hours, by using TransIT-siQuest (Mirus, Madison, USA) at 1:300 dilution in complete medium, according to the manufacturer's recommendation. The protein extracts were obtained 27 hours post-transfection. Western blot of protein extracts from Cav1<sup>+/+</sup> and Cav1<sup>-/-</sup> cell lines; β-actin as loading control. A representative experiment is shown (N=2).
