# Supplementary material for: Caveolin-1 is required for TGF-β-induced transactivation of the EGF receptor pathway in hepatocytes through the activation of the metalloprotease TACE/ADAM17
Source: PubMed Central journal article supplement — Cell Death Dis. 2014 Jul 17;5(7):e1326–. doi: 10.1038/cddis.2014.294 (PMC4123087; doi:10.1038/cddis.2014.294), 2014-07-17
Supplement: cddis2014294x4.pdf [file cddis2014294x4.pdf]

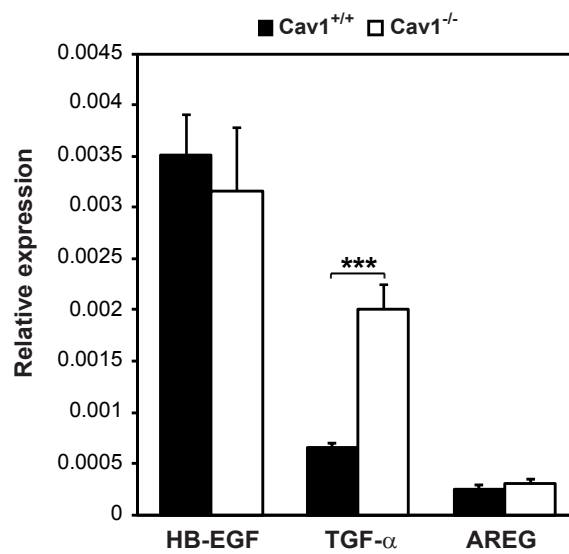

**Supplementary Figure 4. EGFR ligands expression in Cav1<sup>+/+</sup> and Cav1<sup>-/-</sup> hepatocytes at basal conditions.** HB-EGF, TGF- $\alpha$  and AREG (Amphiregulin) relative expression measured by Real Time-PCR (N=3). Results expressed as mean  $\pm$  SEM. Statistical comparison using Student's *t* test: \*\*\* $p$ <0.001.
