# Supplementary material for: Caveolin-1 is required for TGF-β-induced transactivation of the EGF receptor pathway in hepatocytes through the activation of the metalloprotease TACE/ADAM17
Source: PubMed Central journal article supplement — Cell Death Dis. 2014 Jul 17;5(7):e1326–. doi: 10.1038/cddis.2014.294 (PMC4123087; doi:10.1038/cddis.2014.294), 2014-07-17
Supplement: cddis2014294x5.pdf [file cddis2014294x5.pdf]

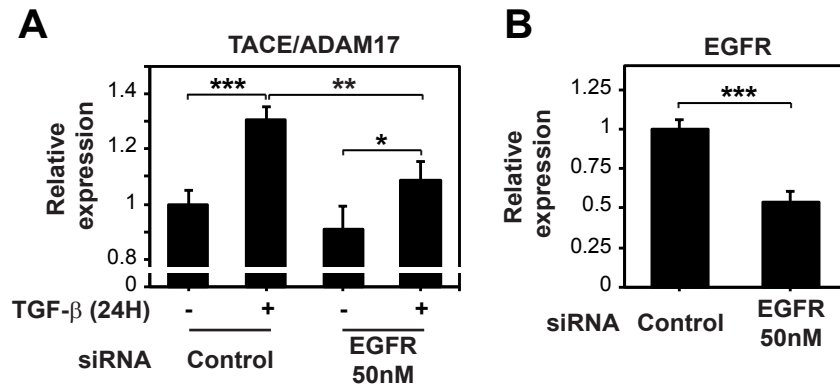

**Supplementary Figure 5. TACE/ADAM17 upregulation after TGF- $\beta$  treatment is dependent on the EGFR pathway.** Cav1<sup>+/+</sup> hepatocytes (50% confluence) were transiently transfected with a specific EGFR siRNA (50 nM) during 8 hours, by using TransIT-siQuest (Mirus, Madison, USA) at 1:300 dilution in complete medium, according to the manufacturer's recommendation. Cells were then treated with TGF- $\beta$  (2 ng/ml) for 24 hours, after previous FBS starvation (16 h). A: TACE/ADAM17 relative expression measured by Real Time-PCR (N=3). B: EGFR relative expression measured by Real Time-PCR (N=3). Results expressed as mean  $\pm$  SEM. Statistical comparison using Student's *t* test to compare control vs. 24 hours TGF- $\beta$  treatment in each siRNA or two-way ANOVA with Bonferroni post-hoc test to compare siControl and siEGFR: \*  $p < 0.05$ , \*\*  $p < 0.01$ ; \*\*\*  $p < 0.001$ .
